# Supplementary material for: Aerosol Delivery of Surfactant Liposomes for Management of Pulmonary Fibrosis: An Approach Supporting Pulmonary Mechanics
Source: MDPI journal article supplement (doi:10.3390/pharmaceutics13111851), 2021-11-03
Supplement: s1 [file s1]

# Supplementary Materials: Aerosol Delivery of Surfactant Liposomes for Management of Pulmonary Fibrosis: An Approach Supporting Pulmonary Mechanics

Sabna Kotta, Hibah Mubarak Aldawsari, Shaimaa M. Badr-Eldin, Lenah S Binmahfouz, Rana Bakur Bakhaidar, Nagaraja Sreeharsha, Anroop B. Nair and Chandramouli Ramnarayanan

| Organ         | Representative Histopathology Image H and E Stained                                 |
|---------------|-------------------------------------------------------------------------------------|
| Liver         | 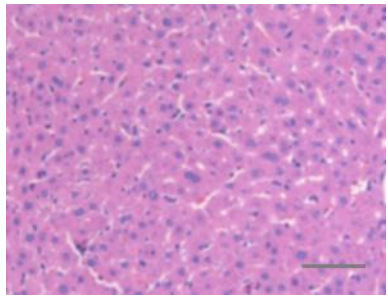  |
| Kidney        |  |
| Spleen        |  |
| Adrenal gland |  |

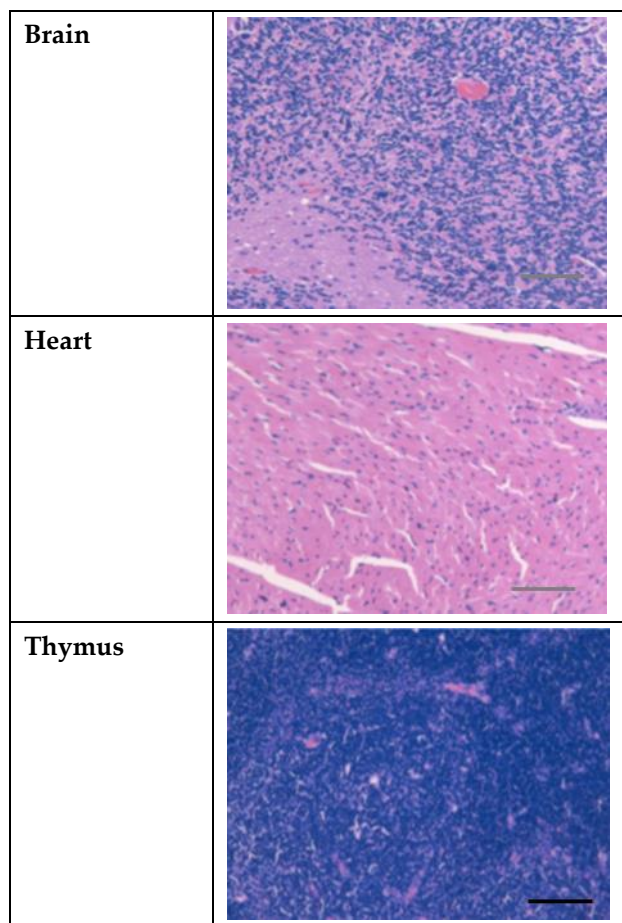

**Figure S1.** Representative histopathology images of vital organs of the treated group number IV. (Scale bar 0.5 mm = 50  $\mu$ m)
